# Supplementary material
Source: PubMed Central journal article supplement (PMC8016469)
Supplement: btaa1037_supplementary_data.pdf [file btaa1037_supplementary_data.pdf]

# Supplementary information for improved protein model quality assessment by integrating sequential and pairwise features using deep learning

Xiaoyang Jing, Jinbo Xu

Toyota Technological Institute at Chicago, Chicago, IL 60637, USA

Table S1. The number of protein targets and decoys of different datasets.

| Dataset    | Data Source | #Targets | #Decoys |
|------------|-------------|----------|---------|
| Training   | CASP 7-11   | 495      | 107060  |
|            | CAMEO       | 1011     | 38444   |
|            | CATH        | 12410    | 189964  |
| Validation | CASP 7-11   | 32       | 6688    |
|            | CAMEO       | 53       | 2010    |
|            | CATH        | 644      | 9739    |
| Test       | CASP12      | 64       | 9423    |
|            | CASP13      | 76       | 11371   |

Table S2. Summary of input features

| Type                         | Feature                      | Type       | Shape                                |
|------------------------------|------------------------------|------------|--------------------------------------|
| Derived from Sequence        | One-hot encoding of sequence | Sequential | L*21                                 |
|                              | rPosition                    | Sequential | L*1                                  |
|                              | PSSM                         | Sequential | L*20                                 |
|                              | Predicted SS3                | Sequential | L*3                                  |
|                              | Predicted ACC                | Sequential | L*3                                  |
|                              | Co-evolution                 | Pairwise   | L*L*4                                |
|                              | Predicted distance potential | Pairwise   | L*L*14                               |
| Derived from model structure | SS3                          | Sequential | L*3                                  |
|                              | RSA                          | Sequential | L*1                                  |
|                              | distance (CaCa, CbCb and NO) | Pairwise   | L*L*3                                |
| Total                        |                              |            | Sequential: L*52<br>Pairwise: L*L*21 |

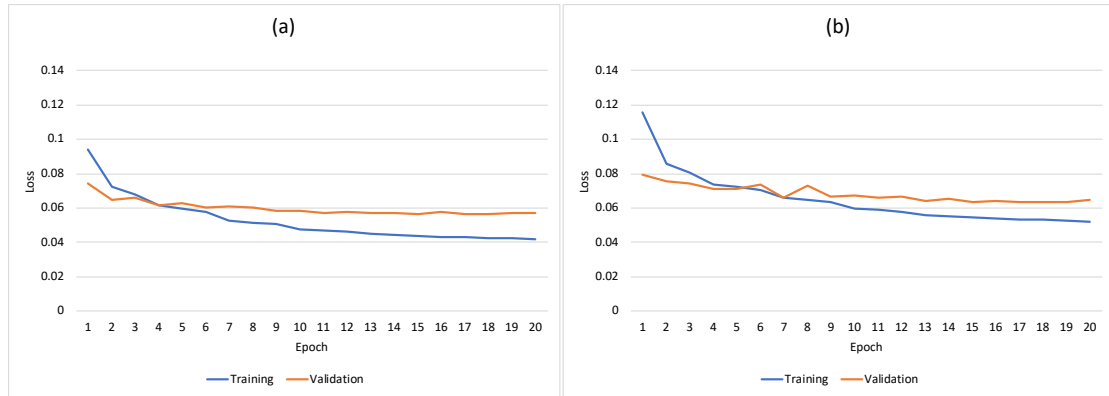

**Fig. S1.** The training and validation losses of ResNetQA and ResNetQA-R. (a) the training and validation losses of ResNetQA, the mean and standard deviation for the training loss are 0.0527 and 0.0128, and those for the validation loss are 0.0599 and 0.0043, respectively; (b) the training and validation losses of ResNetQA-R, the mean and standard deviation for the training loss are 0.0650 and 0.0151, and those for the validation loss are 0.0681 and 0.0047, respectively. The training loss has a larger standard deviation because we employed minibatch-based training. The gap between the validation and the training loss is also likely incurred by minibatch training. The training loss of one epoch is the averaged loss of all the minibatches in this epoch. The loss of one minibatch is calculated when it is being used to update the model parameters. At each iteration, we minimize the loss on one minibatch and thus, the model parameters are biased towards the proteins in this minibatch. As such, it is not surprising that the loss calculated on this minibatch is usually smaller than the validation loss, which is always calculated on the same set of many more proteins.

Table S3. Z-scores<sup>1</sup> of single-model methods on local (S-score) and global (GDT\_TS) QA

| Dataset           | Method                         | Local         |               |               | Global        |               |               |               |               |
|-------------------|--------------------------------|---------------|---------------|---------------|---------------|---------------|---------------|---------------|---------------|
|                   |                                | PCC           | ASE           | AUC           | PCC           | Spearman      | Kendall       | Diff          | Loss          |
| CASP12<br>Stage 2 | <b>ResNetQA</b> <sup>2</sup>   | 0.9650        | <b>0.8942</b> | <b>0.8890</b> | 0.6529        | 0.5925        | 0.6343        | <b>0.7620</b> | 0.2905        |
|                   | <b>ResNetQA-R</b> <sup>3</sup> | <b>0.9773</b> | 0.8371        | 0.8687        | <b>0.7619</b> | <b>0.6729</b> | <b>0.7288</b> | 0.4259        | 0.4160        |
|                   | ProQ3                          | 0.2064        | 0.0729        | 0.2397        | 0.0972        | 0.1410        | 0.0665        | 0.2141        | <b>0.4298</b> |
|                   | ProQ2                          | 0.1571        | -0.3423       | 0.1917        | -0.0442       | 0.0175        | -0.0586       | -0.0752       | 0.2943        |
|                   | Wang4                          | 0.0649        | 0.0387        | 0.0622        | 0.0119        | -0.0075       | -0.0557       | -0.0190       | -0.1084       |
|                   | VoroMQA                        | 0.0589        | -0.2259       | 0.0568        | -0.0694       | -0.0618       | -0.1359       | -0.5319       | 0.1066        |
|                   | SPARKS-X                       | -0.0534       | 0.0225        | -0.0569       | 0.1855        | 0.2426        | 0.2071        | -0.1386       | 0.2248        |
| CASP13<br>Stage 2 | <b>ResNetQA</b>                | 0.6380        | <b>0.8094</b> | 0.5682        | 0.6317        | 0.3979        | 0.3933        | <b>0.7656</b> | -0.1158       |
|                   | <b>ResNetQA-R</b>              | <b>0.7007</b> | 0.7330        | <b>0.6325</b> | <b>0.7335</b> | <b>0.5695</b> | <b>0.5955</b> | 0.4081        | 0.1211        |
|                   | ProQ3D                         | 0.3005        | 0.3126        | 0.3390        | -0.0979       | -0.1302       | -0.2012       | 0.4285        | <b>0.1229</b> |
|                   | ProQ3                          | 0.2840        | 0.2433        | 0.3737        | -0.4067       | -0.3973       | -0.4546       | 0.2327        | 0.0871        |
|                   | ProQ4                          | 0.2532        | -0.3786       | 0.2671        | 0.1932        | 0.1183        | 0.1561        | 0.1427        | 0.0669        |
|                   | VoroMQA-A                      | 0.2293        | -0.0446       | 0.2749        | -0.1434       | -0.2366       | -0.3040       | -0.1397       | 0.0326        |
|                   | VoroMQA-B                      | 0.2206        | -0.0501       | 0.2623        | -0.2758       | -0.3162       | -0.3786       | -0.1659       | 0.1198        |

1. To calculate the Z-score for each target, we collect the quality estimations of all groups participating in CASP12 and CASP13, evaluate their performances by local and global QA metrics, respectively, and then calculate the mean and standard deviation of the scores of all groups for each metric, which are then used to calculate Z-score. The Z-score of our methods (ResNetQA and ResNetQA-R) are calculated using the same mean and standard deviation as other methods. Note that the CASP assessors may set a Z-score to -2 or 0 if it is smaller than -2 or 0, respectively, but here we do not do that.

2. The model trained using local and global MSE loss.

3. The model trained using local and global MSE loss plus global margin ranking loss.

Table S4. Performances of single-model methods on global QA (IDDT)

| Dataset           | Method            | Global         |                     |                    |                   |                   |
|-------------------|-------------------|----------------|---------------------|--------------------|-------------------|-------------------|
|                   |                   | PCC $\uparrow$ | Spearman $\uparrow$ | Kendall $\uparrow$ | Diff $\downarrow$ | Loss $\downarrow$ |
| CASP12<br>Stage 2 | <b>ResNetQA</b>   | 0.8298         | 0.7586              | 0.5919             | 0.1035            | 0.0515            |
|                   | <b>ResNetQA-R</b> | <b>0.8527</b>  | <b>0.7860</b>       | <b>0.6186</b>      | <b>0.0712</b>     | 0.0469            |
|                   | ProQ3             | 0.7239         | 0.6760              | 0.5025             | 0.1283            | <b>0.0382</b>     |
|                   | ProQ2             | 0.7131         | 0.6746              | 0.4999             | 0.1032            | 0.0448            |
|                   | Wang4             | 0.7130         | 0.6432              | 0.4822             | 0.1672            | 0.0828            |
|                   | VoroMQA           | 0.6986         | 0.6501              | 0.4798             | 0.1957            | 0.0530            |
|                   | SPARKS-X          | 0.7754         | 0.7163              | 0.5466             | 0.1691            | 0.0471            |
| CASP13<br>Stage 2 | <b>ResNetQA</b>   | <b>0.8673</b>  | 0.7918              | 0.6272             | 0.1127            | 0.0707            |
|                   | <b>ResNetQA-R</b> | 0.8661         | <b>0.8096</b>       | <b>0.6487</b>      | <b>0.0821</b>     | <b>0.0541</b>     |
|                   | ProQ3D            | 0.7246         | 0.6849              | 0.5156             | 0.1470            | 0.0675            |
|                   | ProQ3             | 0.6711         | 0.6418              | 0.4761             | 0.1511            | 0.0711            |
|                   | ProQ4             | 0.8125         | 0.7636              | 0.6120             | 0.1309            | 0.0597            |
|                   | VoroMQA-A         | 0.6968         | 0.6560              | 0.4909             | 0.1929            | 0.0838            |
|                   | VoroMQA-B         | 0.6676         | 0.6315              | 0.4687             | 0.1945            | 0.0796            |

Table S5. Performances of single-model methods on local and global QA (IDDT)

| Dataset           | Method                             | Local         |               |               | Global        |               |               |               |               |
|-------------------|------------------------------------|---------------|---------------|---------------|---------------|---------------|---------------|---------------|---------------|
|                   |                                    | PCC↑          | ASE↑          | AUC↑          | PCC↑          | Spearman↑     | Kendall↑      | Diff↓         | Loss↓         |
| CASP12<br>Stage 2 | <b>ResNetQA-IDDT<sup>1</sup></b>   | 0.7178        | 0.9032        | 0.8709        | 0.8632        | 0.7972        | 0.6402        | <b>0.0645</b> | 0.0484        |
|                   | <b>ResNetQA-R-IDDT<sup>2</sup></b> | <b>0.7235</b> | <b>0.9039</b> | <b>0.8747</b> | <b>0.8935</b> | <b>0.8265</b> | <b>0.6688</b> | 0.0726        | 0.0393        |
|                   | ProQ4                              | 0.5899        | 0.8844        | 0.8051        | 0.8350        | 0.7822        | 0.6085        | 0.0764        | <b>0.0308</b> |
| CASP13<br>Stage 2 | <b>ResNetQA-IDDT</b>               | 0.7186        | 0.8994        | 0.8859        | 0.8434        | 0.8011        | 0.6471        | <b>0.0698</b> | 0.0641        |
|                   | <b>ResNetQA-R-IDDT</b>             | <b>0.7318</b> | <b>0.9012</b> | <b>0.8913</b> | <b>0.8719</b> | <b>0.8267</b> | <b>0.6722</b> | 0.0719        | 0.0693        |
|                   | ProQ4                              | 0.6038        | 0.8799        | 0.8222        | 0.8266        | 0.7902        | 0.6207        | 0.0818        | <b>0.0536</b> |

1. The model trained using local and global MSE (mean-squared error) loss based on IDDT.

2. The model trained using local and global MSE loss plus global margin ranking loss based on IDDT.

Table S6. Z-scores of single-model methods on CASP12&amp;13 FM targets (S-score and GDT\_TS)

| Dataset           | Method            | Local         |               |               | Global        |               |               |               |               |
|-------------------|-------------------|---------------|---------------|---------------|---------------|---------------|---------------|---------------|---------------|
|                   |                   | PCC           | ASE           | AUC           | PCC           | Spearman      | Kendall       | Diff          | Loss          |
| CASP12<br>Stage 2 | <b>ResNetQA</b>   | 1.3887        | <b>1.2560</b> | <b>1.2853</b> | 0.8417        | 0.9632        | 1.0463        | <b>0.7803</b> | 0.4747        |
|                   | <b>ResNetQA-R</b> | <b>1.4393</b> | 1.1927        | 1.2708        | <b>1.0490</b> | <b>1.0936</b> | <b>1.2041</b> | 0.2849        | 0.5350        |
|                   | ProQ3             | 0.1910        | -0.0364       | 0.1698        | 0.1536        | 0.1278        | 0.0720        | 0.2546        | <b>0.6030</b> |
|                   | ProQ2             | 0.2323        | -0.5391       | 0.1909        | 0.0936        | 0.0791        | 0.0366        | -0.3403       | 0.2560        |
|                   | Wang4             | 0.1222        | 0.2101        | 0.0707        | 0.2330        | 0.3010        | 0.2819        | 0.5007        | 0.1269        |
|                   | VoroMQA           | 0.1570        | -0.2644       | 0.0920        | -0.0413       | -0.1599       | -0.2139       | 0.3391        | 0.0168        |
|                   | SPARKS-X          | -0.0195       | 0.6476        | -0.0758       | 0.3237        | 0.4362        | 0.4200        | 0.4192        | 0.2335        |
| CASP13<br>Stage 2 | <b>ResNetQA</b>   | 0.7084        | <b>1.0135</b> | 0.5505        | 0.9249        | 0.7465        | 0.7526        | <b>0.8024</b> | 0.1904        |
|                   | <b>ResNetQA-R</b> | <b>0.8612</b> | 0.9589        | <b>0.7229</b> | <b>1.1230</b> | <b>1.0214</b> | <b>1.0852</b> | 0.1785        | <b>0.3093</b> |
|                   | ProQ3D            | 0.2075        | 0.3199        | 0.2987        | -0.1303       | -0.2248       | -0.2529       | 0.5391        | -0.1015       |
|                   | ProQ3             | 0.2205        | 0.2413        | 0.3568        | -0.4350       | -0.5446       | -0.5481       | 0.2366        | -0.1511       |
|                   | ProQ4             | 0.2492        | -0.5419       | 0.2292        | 0.1495        | 0.1027        | 0.1040        | 0.1390        | 0.2304        |
|                   | VoroMQA-A         | 0.1772        | -0.1309       | 0.2225        | -0.3291       | -0.3572       | -0.4173       | 0.3736        | 0.1182        |
|                   | VoroMQA-B         | 0.1608        | -0.1259       | 0.2010        | -0.4215       | -0.4458       | -0.4873       | 0.3508        | 0.1982        |

Table S7. Performances of single-model methods on CASP12&amp;13 FM targets (global IDDT)

| Dataset           | Method            | Global        |               |               |               |               |
|-------------------|-------------------|---------------|---------------|---------------|---------------|---------------|
|                   |                   | PCC↑          | Spearman↑     | Kendall↑      | Diff↓         | Loss↓         |
| CASP12<br>Stage 2 | <b>ResNetQA</b>   | 0.7291        | 0.7390        | 0.5732        | 0.1103        | 0.0434        |
|                   | <b>ResNetQA-R</b> | <b>0.7827</b> | <b>0.7845</b> | <b>0.6143</b> | <b>0.0589</b> | <b>0.0380</b> |
|                   | ProQ3             | 0.6405        | 0.6215        | 0.4524        | 0.1149        | 0.0433        |
|                   | ProQ2             | 0.6781        | 0.6603        | 0.4867        | 0.0941        | 0.0512        |
|                   | Wang4             | 0.7016        | 0.6900        | 0.5207        | 0.1242        | 0.0603        |
|                   | VoroMQA           | 0.6399        | 0.5981        | 0.4331        | 0.1082        | 0.0612        |
|                   | SPARKS-X          | 0.7352        | 0.7225        | 0.5483        | 0.1263        | 0.0478        |
| CASP13<br>Stage 2 | <b>ResNetQA</b>   | 0.8438        | 0.8175        | 0.6437        | 0.1205        | 0.0625        |
|                   | <b>ResNetQA-R</b> | <b>0.8599</b> | <b>0.8490</b> | <b>0.6874</b> | <b>0.0587</b> | <b>0.0543</b> |
|                   | ProQ3D            | 0.6524        | 0.6410        | 0.4711        | 0.1358        | 0.0994        |
|                   | ProQ3             | 0.5871        | 0.5772        | 0.4151        | 0.1466        | 0.1036        |
|                   | ProQ4             | 0.7613        | 0.7533        | 0.5964        | 0.0734        | 0.0552        |
|                   | VoroMQA-A         | 0.5803        | 0.5728        | 0.4105        | 0.1133        | 0.0908        |
|                   | VoroMQA-B         | 0.5637        | 0.5530        | 0.3966        | 0.1151        | 0.0866        |

Table S8. Performances of single-model methods on CASP12&amp;13 FM targets (local and global IDDT)

| Dataset           | Method                 | Local         |               |               | Global        |               |               |               |               |
|-------------------|------------------------|---------------|---------------|---------------|---------------|---------------|---------------|---------------|---------------|
|                   |                        | PCC↑          | ASE↑          | AUC↑          | PCC↑          | Spearman↑     | Kendall↑      | Diff↓         | Loss↓         |
| CASP12<br>Stage 2 | <b>ResNetQA-IDDT</b>   | 0.6692        | 0.9149        | 0.8333        | 0.8328        | 0.8297        | 0.6711        | <b>0.0597</b> | 0.0412        |
|                   | <b>ResNetQA-R-IDDT</b> | <b>0.6802</b> | <b>0.9154</b> | <b>0.8381</b> | <b>0.8642</b> | <b>0.8544</b> | <b>0.6987</b> | 0.0728        | <b>0.0285</b> |
|                   | ProQ4                  | 0.5020        | 0.8957        | 0.7425        | 0.7708        | 0.7429        | 0.5657        | 0.0566        | 0.0375        |
| CASP13<br>Stage 2 | <b>ResNetQA-IDDT</b>   | 0.6688        | 0.9051        | 0.8469        | 0.8513        | 0.8618        | 0.7055        | 0.0661        | <b>0.0432</b> |
|                   | <b>ResNetQA-R-IDDT</b> | <b>0.6929</b> | <b>0.9128</b> | <b>0.8548</b> | <b>0.8666</b> | <b>0.8710</b> | <b>0.7228</b> | 0.0679        | 0.0492        |
|                   | ProQ4                  | 0.5088        | 0.8872        | 0.7506        | 0.7747        | 0.7641        | 0.5883        | <b>0.0619</b> | 0.0461        |

Table S9. Performances of deep ResNet built with different features on all targets<sup>1</sup>

| Dataset | Method                  | Local                   |               |               | Global        |               |               |             |             |      |
|---------|-------------------------|-------------------------|---------------|---------------|---------------|---------------|---------------|-------------|-------------|------|
|         |                         | PCC↑                    | ASE↑          | AUC↑          | PCC↑          | Spearman↑     | Kendall↑      | Diff↓       | Loss↓       |      |
| CASP12  | All <sup>2</sup>        | 0.5866                  | <b>0.8515</b> | 0.8058        | <b>0.8109</b> | <b>0.7293</b> | <b>0.5606</b> | 7.85        | <b>6.12</b> |      |
|         | No Cov <sup>3</sup>     | <b>0.5874</b>           | 0.8507        | <b>0.8063</b> | 0.8011        | 0.7135        | 0.5459        | <b>7.58</b> | 7.30        |      |
|         | No SS&RSA <sup>4</sup>  | 0.5643                  | 0.8302        | 0.7996        | 0.7788        | 0.6876        | 0.5247        | 8.77        | 7.33        |      |
|         | Stage 2                 | No DistPot <sup>5</sup> | 0.5319        | 0.8243        | 0.7804        | 0.7192        | 0.6233        | 0.4654      | 9.57        | 7.76 |
|         | 1D-DistPot <sup>6</sup> | 0.2735                  | 0.6965        | 0.6412        | 0.4046        | 0.3510        | 0.2444        | 16.46       | 11.92       |      |
|         | 1D <sup>7</sup>         | 0.2619                  | 0.6612        | 0.6347        | 0.3887        | 0.3333        | 0.2322        | 17.93       | 14.39       |      |
| CASP13  | All                     | <b>0.5539</b>           | <b>0.8373</b> | <b>0.7901</b> | <b>0.8157</b> | <b>0.7396</b> | <b>0.5726</b> | <b>8.61</b> | 8.44        |      |
|         | No Cov                  | 0.5474                  | 0.8248        | 0.7889        | 0.8020        | 0.7226        | 0.5551        | 8.97        | <b>8.29</b> |      |
|         | No SS&RSA               | 0.5416                  | 0.8057        | 0.7840        | 0.7771        | 0.7042        | 0.5361        | 9.69        | 10.68       |      |
|         | Stage 2                 | No DistPot              | 0.5000        | 0.7971        | 0.7749        | 0.7450        | 0.6784        | 0.5071      | 10.57       | 9.99 |
|         | 1D-DistPot              | 0.2963                  | 0.6981        | 0.6618        | 0.5119        | 0.4694        | 0.3336        | 15.24       | 16.36       |      |
|         | 1D                      | 0.2630                  | 0.6711        | 0.6441        | 0.5100        | 0.4595        | 0.3261        | 15.74       | 14.00       |      |

1. The proteins in the training data for ablation studies are filtered out only by BLAST based on sequence identity.
2. All features are used.
3. Excluding coevolution information including mutual information and the information produced by CCMPred.
4. Excluding predicted and model-derived secondary structures and solvent accessibilities.
5. Excluding predicted distance potentials, but coevolution information is used.
6. Using sequential features plus the marginalized distance potentials predicted by RaptorX.
7. Only sequential features are used.

Table S10. Performances of deep ResNet built with different features on FM targets

| Dataset | Method     | Local         |               |               | Global        |               |               |             |             |      |
|---------|------------|---------------|---------------|---------------|---------------|---------------|---------------|-------------|-------------|------|
|         |            | PCC↑          | ASE↑          | AUC↑          | PCC↑          | Spearman↑     | Kendall↑      | Diff↓       | Loss↓       |      |
| CASP12  | All        | 0.4545        | <b>0.8930</b> | 0.7487        | <b>0.7213</b> | <b>0.7270</b> | <b>0.5535</b> | <b>5.84</b> | <b>5.49</b> |      |
|         | No Cov     | <b>0.4590</b> | 0.8868        | <b>0.7544</b> | 0.7188        | 0.7221        | 0.5491        | 6.28        | 6.35        |      |
|         | No SS&RSA  | 0.4207        | 0.8647        | 0.7404        | 0.6599        | 0.6857        | 0.5204        | 6.87        | 5.54        |      |
|         | Stage 2    | No DistPot    | 0.3633        | 0.8505        | 0.7044        | 0.5636        | 0.5599        | 0.4126      | 8.71        | 8.99 |
|         | 1D-DistPot | 0.1983        | 0.6771        | 0.6005        | 0.2919        | 0.2656        | 0.1818        | 18.27       | 13.51       |      |
|         | 1D         | 0.2025        | 0.6063        | 0.6095        | 0.2978        | 0.2728        | 0.1858        | 21.00       | 15.73       |      |
| CASP13  | All        | <b>0.4045</b> | <b>0.8718</b> | <b>0.7308</b> | <b>0.7978</b> | <b>0.7871</b> | <b>0.6122</b> | <b>7.22</b> | 9.14        |      |
|         | No Cov     | 0.3997        | 0.8477        | 0.7322        | 0.7766        | 0.7728        | 0.5970        | 8.53        | <b>6.91</b> |      |
|         | No SS&RSA  | 0.3790        | 0.8237        | 0.7213        | 0.7580        | 0.7482        | 0.5690        | 8.60        | 10.45       |      |
|         | Stage 2    | No DistPot    | 0.3495        | 0.8199        | 0.7156        | 0.6783        | 0.6611        | 0.4911      | 10.13       | 8.04 |
|         | 1D-DistPot | 0.1673        | 0.6563        | 0.5972        | 0.3253        | 0.3371        | 0.2341        | 18.42       | 18.87       |      |
|         | 1D         | 0.1527        | 0.6059        | 0.5964        | 0.3359        | 0.3445        | 0.2403        | 20.04       | 19.06       |      |

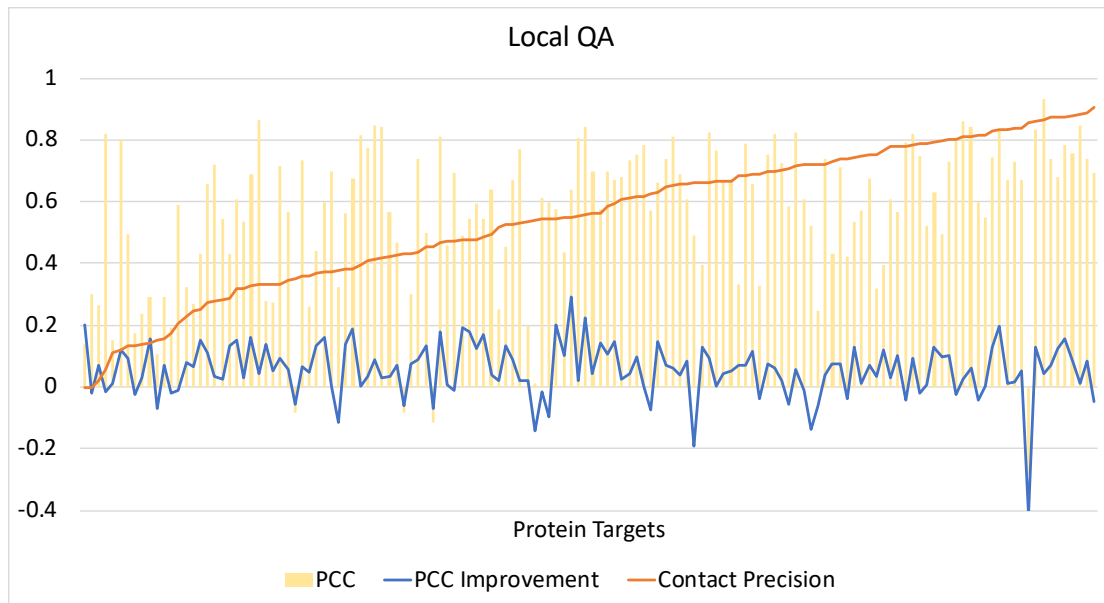

**Fig. S2.** The correlation between the distance prediction quality and the local QA performance on CASP12 and CASP13 protein targets. Contact Precision: the Top L (L is the sequence length) long-range contact precision of the distance prediction by RaptorX-Contact; PCC: the local QA PCC performance of our method when all features used; PCC Improvement: the improvement on local QA PCC resulting from using predicted distance potential as one feature. The data are sorted from low to high according to contact precision. The correlation between the distance prediction quality and the PCC improvement is -0.1081. That is, the improvement is more pronounced on harder targets (which usually have lower contact precision).

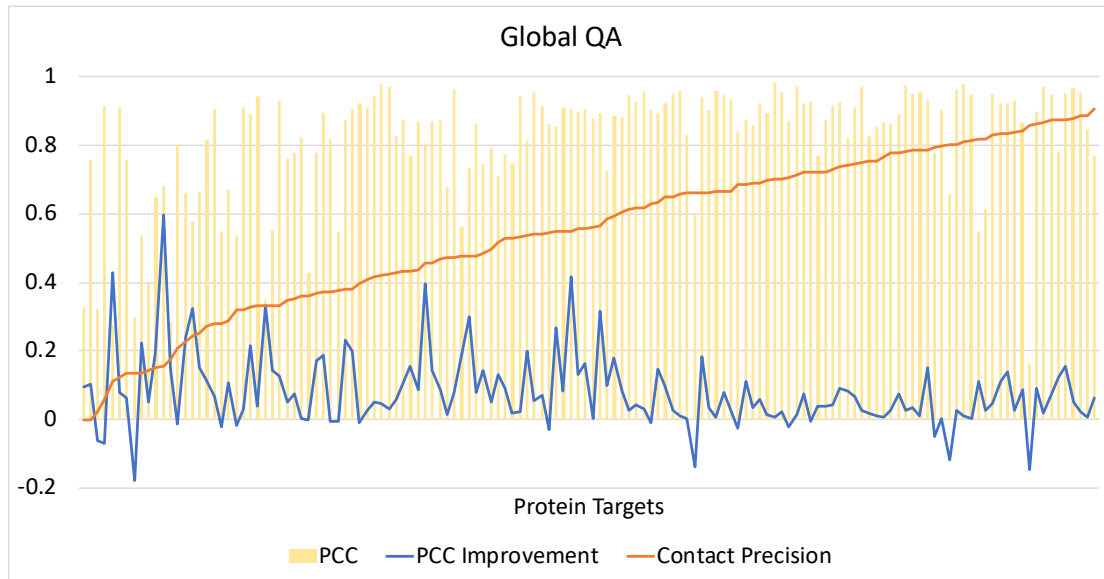

**Fig. S3.** The correlation between the distance prediction quality and the global QA performance on CASP12 and CASP13 protein targets. Contact Precision: the Top L (L is the sequence length) long-range contact precision of the distance prediction by RaptorX-Contact; PCC: the global QA PCC performance of the model using all features; PCC Improvement: the improvement on global QA PCC resulting from using predicted distance potential as one feature. The data are sorted from low to high according to contact precision. The correlation between the distance prediction quality and the PCC improvement is  $-0.2783$ . That is, the improvement is more pronounced on harder targets (which usually have lower contact precision).

Table S11. Performances of deep models trained with and without the CATH dataset

| Dataset           | Method                  | Local          |                |                | Global         |                     |                    |                   |                   |
|-------------------|-------------------------|----------------|----------------|----------------|----------------|---------------------|--------------------|-------------------|-------------------|
|                   |                         | PCC $\uparrow$ | ASE $\uparrow$ | AUC $\uparrow$ | PCC $\uparrow$ | Spearman $\uparrow$ | Kendall $\uparrow$ | Diff $\downarrow$ | Loss $\downarrow$ |
| CASP12<br>Stage 2 | ResNetQA                | <b>0.5866</b>  | <b>0.8515</b>  | <b>0.8058</b>  | <b>0.8109</b>  | <b>0.7293</b>       | <b>0.5606</b>      | <b>7.85</b>       | <b>6.12</b>       |
|                   | NoCATH-Pot <sup>1</sup> | 0.5450         | 0.8425         | 0.7870         | 0.7520         | 0.6736              | 0.5094             | 9.96              | 8.93              |
|                   | NoCATH-PR <sup>2</sup>  | 0.5375         | 0.8318         | 0.7886         | 0.7563         | 0.6914              | 0.5259             | 10.36             | 7.02              |
| CASP13<br>Stage 2 | ResNetQA                | <b>0.5539</b>  | <b>0.8373</b>  | <b>0.7901</b>  | <b>0.8157</b>  | <b>0.7396</b>       | <b>0.5726</b>      | <b>8.61</b>       | <b>8.44</b>       |
|                   | NoCATH-Pot              | 0.5276         | 0.8134         | 0.7890         | 0.7873         | 0.7217              | 0.5518             | 12.11             | 9.47              |
|                   | NoCATH-PR               | 0.5321         | 0.8037         | 0.7862         | 0.7752         | 0.7005              | 0.5318             | 12.14             | 9.64              |

1. NoCATH-Pot: predicted distance potential is an input feature. NoCATH means that the CATH data is not used in training.
2. NoCATH-PR: predicted distance probability is an input feature.
